# Supplementary material for: AgBi(SO4)(IO3)2: aliovalent substitution induces structure dimensional upgrade and second harmonic generation enhancement
Source: Royal Society of Chemistry journal article supplement (doi:10.1039/d0cc07862j), 2021-01-01
Supplement: d0cc07862j1.pdf [file d0cc07862j1.pdf]

## Supporting Information

# AgBi(SO<sub>4</sub>)(IO<sub>3</sub>)<sub>2</sub>: Aliovalent Substitution Induces Structure Dimensional Upgrade and Second Harmonic Generation Enhancement

Hongming Liu<sup>a,b,e</sup>, Qingchen Wu<sup>c</sup>, Lili Liu<sup>b,d</sup>, Zheshuai Lin,<sup>\*c</sup> P. Shiv Halasyamani,<sup>\*b</sup> Xingguo Chen<sup>\*a</sup> and Jingui Qin<sup>a</sup>

<sup>a</sup> Hubei Key Laboratory on Organic and Polymeric Opto-electronic Materials, College of Chemistry and Molecular Sciences, Wuhan University, Wuhan 430072, China. E-mail: [xgchen@whu.edu.cn](mailto:xgchen@whu.edu.cn)

<sup>b</sup> Department of Chemistry, University of Houston, 112 Fleming Building, Houston, Texas 77204, USA. E-mail: [psh@uh.edu](mailto:psh@uh.edu)

<sup>c</sup> Beijing Center for Crystal R&D, Technical Institute of Physics and Chemistry, Chinese Academy of Sciences Beijing 100190, China. E-mail: [zslin@mail.ipc.ac.cn](mailto:zslin@mail.ipc.ac.cn)

<sup>d</sup> School of Materials Science and Engineering, Shanghai Institute of Technology, Shanghai 200235, China

<sup>e</sup> School of Chemistry and Chemical Engineering, Guangxi University, Nanning 530004, China.

## Table of Contents

| Section      | Title                                                                                                                                                                             | Page  |
|--------------|-----------------------------------------------------------------------------------------------------------------------------------------------------------------------------------|-------|
| Experimental | Reagents, synthesis, measurements and instruments, first-principle calculation                                                                                                    | S3-S4 |
| Table S1     | Crystallographic data and structure refinement for <b>ABSI</b>                                                                                                                    | S5    |
| Table S2     | Atomic coordinates, equivalent isotropic displacement parameters, and BVC for <b>ABSI</b>                                                                                         | S6    |
| Table S3     | Selected bond lengths for <b>ABSI</b>                                                                                                                                             | S7    |
| Table S4     | Band gaps of some reported bismuth-containing iodates                                                                                                                             | S7    |
| Figure S1    | The image of single crystals of <b>ABSI</b>                                                                                                                                       | S8    |
| Figure S2    | Simulated and measured powder X-ray diffraction patterns of <b>ABSI</b>                                                                                                           | S8    |
| Figure S3    | The three-dimensional structure of <b>ABSI</b>                                                                                                                                    | S9    |
| Figure S4    | The unit cell of <b>ABSI</b>                                                                                                                                                      | S9    |
| Figure S5    | The framework of $\text{AgBi}(\text{IO}_3)_4$ and $\text{AgBi}(\text{SO}_4)(\text{IO}_3)_2$                                                                                       | S10   |
| Figure S6    | The approximate local dipole moment for $[\text{IO}_3]$ groups on both sides of $[\text{Bi}_2\text{I}_4\text{O}_{15}]^-$ layer in the structure of $\text{AgBi}(\text{IO}_3)_4$ . | S10   |
| Figure S7    | Oscilloscope traces of the SHG signals for KDP, <b>ABI</b> and <b>ABSI</b> at the powder size of 200-250 $\mu\text{m}$ under 1064 nm laser radiation                              | S11   |
| Figure S8    | The IR spectrum of <b>ABSI</b>                                                                                                                                                    | S11   |
| Figure S9    | The UV-vis diffuse reflectance spectrum of <b>ABSI</b>                                                                                                                            | S12   |
| Figure S10   | TG and DTA curves for <b>ABSI</b>                                                                                                                                                 | S12   |
| Figure S11   | The powder XRD patterns of the residue after TG analysis of <b>ABSI</b>                                                                                                           | S13   |
| Figure S12   | The calculated electron band structures of <b>ABSI</b>                                                                                                                            | S13   |
| Figure S13   | The partial density of states (PDOS) projected onto the constituent atoms of <b>ABSI</b>                                                                                          | S14   |
| Figure S14   | The orbital isosurfaces showing the highest orbital under VBM and the lowest orbital above CBM in <b>ABSI</b>                                                                     | S14   |
| Figure S15   | The approximate local dipole moment for $[\text{IO}_3]$ groups and net-polarization in the unit cell of <b>ABSI</b>                                                               | S15   |
| Figure S16   | The electron localization function (ELF) isosurfaces for the pseudopotential calculations of <b>ABSI</b>                                                                          | S15   |
| References   |                                                                                                                                                                                   | S16   |

## Experimental

**Reagents.** Ag<sub>2</sub>O (Alfa Aesar, 99+%), Bi<sub>2</sub>O<sub>3</sub> (Alfa Aesar, 99%), HIO<sub>3</sub> (Alfa Aesar, 99%), sulfuric acid (Alfa Aesar, 95.0-98.0%). All raw chemicals were purchased from Thermo Fisher Scientific Company and used without further treatment.

**Synthesis.** Raw materials of 0.5 mmol Ag<sub>2</sub>O (0.1158 g), 0.5 mmol Bi<sub>2</sub>O<sub>3</sub> (0.2329 g), 2 mmol HIO<sub>3</sub> (0.3518 g), 4 mL of distilled water, and 1 mL sulfuric acid were loaded in a 23 mL Teflon lined autoclave. The autoclave was closed, heated to 230 °C, and held for 4 days before cooled down to room temperature at a rate of about 2.7 °C/h. The product was filtered and washed with distilled water and ethanol. After drying, colorless block crystals (Figure 1) subsequently determined to be AgBi(SO<sub>4</sub>)(IO<sub>3</sub>)<sub>2</sub> (**ABSI**) were recovered with a yield of approximately 95% based on Bi. The purity of compound was been checked by powder X-ray diffraction (PXRD).

**Powder X-ray diffraction.** PXRD measurement was carried out on a PANalytical X'Pert PRO diffractometer with Cu-K $\alpha$  radiation ( $\lambda=1.54186$  Å) at 40 kV and 45 mA at room temperature. Crystal samples of **ABSI** were ground and scanned in the angular range of  $2\theta = 10^\circ-70^\circ$  with a step size of  $0.008^\circ$  at a scanning rate of  $3^\circ \text{ min}^{-1}$ . As shown in Figure S1, the PXRD pattern matches well with the simulated data from the single-crystal structure.

**Energy dispersive X-ray spectroscopy (EDX).** EDX analyses were performed on an FEI Quanta 200 scanning electron microscope equipped with an energy dispersive X-ray spectrometer. An average molar ratio of approximately 0.87: 1: 1.22: 1.90 for Ag: Bi: S: I was found.

**Single crystal structure determination.** The crystal structure of **ABSI** was determined by single crystal X-ray diffraction. The data were collected at 296 K using a Bruker SMART APEX2 diffractometer equipped with a CCD detector (graphite-monochromated Mo K $\alpha$  radiation,  $\lambda=0.71073$  Å). The SAINT program was applied for data reduction and integration.<sup>1</sup> The structure was solved by direct methods and refined using the SHELXTL-97 software package.<sup>2, 3</sup> Relevant crystallographic data and structure refinement information for **ABSI** are summarized in Table 1, and its selected bond distances are listed in Tables S1-S3.

**Infrared (IR) spectroscopy.** The infrared spectrum from 4000-400 cm<sup>-1</sup> for **ABSI** was recorded on a Thermo Scientific Nicolet iS10 FT-IR spectrometer at room temperature.

**UV-vis-NIR Diffuse Reflectance Spectroscopy.** The UV-vis diffuse reflectance spectrum was recorded on a Varian Cary 5000 UV-vis-NIR spectrophotometer equipped with an integrating sphere in the wavelength range of 200-1000 nm. The absorption spectrum was calculated from the reflectance spectrum using the Kubelka–Munk function:  $\alpha/S = (1-R)^2/2R$ , where  $\alpha$  is the absorption coefficient,  $S$  is the scattering coefficient, and  $R$  is the reflectance, respectively.<sup>4</sup>

**Thermogravimetric (TG) analysis.** The TG analysis was carried out using an EXSTAR TG/DTA 6300 analyzer. Fine crystal samples of about 15 mg were added into a platinum crucible and heated from room temperature to 700 °C at a heating rate of 10 °C/min under a flowing nitrogen

atmosphere.

**Second harmonic generation (SHG) measurement.** The SHG measurement was carried out using the method of Kurtz and Perry<sup>5</sup> at 1064 nm and 1950 nm respectively. Polycrystalline samples of **ABSI** were ground and sieved into particle size ranges of 20-45, 45-63, 63-75, 75-90, 90-125, 125-145, 145-200 and 200-250  $\mu\text{m}$  for the test. Similarly sieved microcrystalline  $\text{KH}_2\text{PO}_4$  (KDP) and  $\text{KTiOPO}_4$  (KTP) served as the standard.

**First-principle calculations.** First-principle calculations were conducted using the CASTEP software<sup>6</sup>, a plane-wave pseudopotential package based on density functional theory (DFT)<sup>7</sup>. The exchange-correlation energy was described by the generalized gradient approximation (GGA)<sup>8</sup> scheme of Perdew–Burke–Ernzerhof (PBE) functional.<sup>9</sup> Norm-conserving pseudopotentials<sup>10</sup> (Ag  $4s^2 4p^6 4d^{10} 5s^1$ , Bi  $5d^{10} 6s^2 6p^3$ , I  $5s^2 5p^5$ , O  $2s^2 2p^4$ , S  $3s^2 3p^4$ ) were employed to simulate the ion-electron interactions. A kinetic energy cutoff of 850 eV and Monkhorst-Pack<sup>11</sup>  $k$ -point meshes ( $5 \times 4 \times 2$ ) spanning less than  $0.04/\text{\AA}^3$  in the Brillouin zone were chosen. Before calculating electronic structure and optical properties, the atomic positions in the unit cell were fully optimized using BFGS<sup>12</sup> method, while the cell parameters were fixed. Due to the discontinuity of exchange-correlation, band gaps calculated by the GGA method are usually smaller than experimental values. Therefore, a scissors operator<sup>13</sup> was adopted to raise the conduction bands to match the experimental value. Using the scissors-corrected electronic structure, the SHG coefficients were calculated using an expression developed by Lin *et al.*<sup>14</sup> To further evaluate the contributions of relevant groups to SHG effect, an SHG-weighted electron density analysis<sup>15</sup> was performed.

Table S1. Crystallographic data and structure refinement for **ABSI**.

|                                                                                                                                      |                                                        |
|--------------------------------------------------------------------------------------------------------------------------------------|--------------------------------------------------------|
| Formula                                                                                                                              | $\text{Ag}_2\text{Bi}_2(\text{SO}_4)_2(\text{IO}_3)_4$ |
| FW                                                                                                                                   | 1525.42                                                |
| Space group                                                                                                                          | Triclinic, <i>P1</i>                                   |
| a(Å)                                                                                                                                 | 5.5189(4)                                              |
| b(Å)                                                                                                                                 | 6.9129(4)                                              |
| c(Å)                                                                                                                                 | 11.8527(8)                                             |
| $\alpha$ (°)                                                                                                                         | 90.5980(10)                                            |
| $\beta$ (°)                                                                                                                          | 92.1510(10)                                            |
| $\gamma$ (°)                                                                                                                         | 109.8950(10)                                           |
| Volume(Å <sup>3</sup> )                                                                                                              | 424.78(5)                                              |
| Z                                                                                                                                    | 1                                                      |
| $D_{\text{calcd}}$ (Mg/m <sup>3</sup> )                                                                                              | 5.963                                                  |
| Absorption coefficient (mm <sup>-1</sup> )                                                                                           | 30.546                                                 |
| F(000)                                                                                                                               | 664                                                    |
| Crystal size(mm <sup>3</sup> )                                                                                                       | 0.020×0.020×0.020                                      |
| GOF on F <sup>2</sup>                                                                                                                | 1.065                                                  |
| Flack parameter                                                                                                                      | 0.095(5)                                               |
| $R_1/wR_2$ [ $I > 2\sigma(I)$ ]                                                                                                      | 0.0368/0.0905                                          |
| $R_1/wR_2$ (all data)                                                                                                                | 0.0368/0.0905                                          |
| $R_1 = \sum   F_o  -  F_c   / \sum  F_o $ and $wR_2 = [\sum w(F_o^2 - F_c^2)^2 / \sum wF_o^4]^{1/2}$<br>for $F_o^2 > 2\sigma(F_o^2)$ |                                                        |

Table S2. Atomic coordinates ( $\times 10^4$ ), equivalent isotropic displacement parameters ( $\text{\AA}^2 \times 10^3$ ), and BVC for **ABSI**.  $U(\text{eq})$  is defined as one third of the trace of the orthogonalized  $U^{ij}$  tensor.

| Atom  | x         | y         | z        | $U(\text{eq})$ | BVC  |
|-------|-----------|-----------|----------|----------------|------|
| Ag(1) | 1836(3)   | 304(2)    | 9316(2)  | 18(1)          | 1.00 |
| Ag(2) | 5926(3)   | 8511(3)   | 7321(2)  | 18(1)          | 1.02 |
| Bi(1) | 35(1)     | 5908(1)   | 4939(1)  | 9(1)           | 3.02 |
| Bi(2) | 4886(1)   | 6247(1)   | 464(1)   | 9(1)           | 3.11 |
| I(1)  | 2542(2)   | 2028(2)   | 6583(1)  | 9(1)           | 5.18 |
| I(2)  | -572(2)   | 5348(2)   | 8123(1)  | 7(1)           | 4.87 |
| I(3)  | -2063(2)  | 2285(2)   | 915(1)   | 7(1)           | 4.89 |
| I(4)  | 6566(2)   | 9883(2)   | 4456(1)  | 6(1)           | 4.97 |
| O(1)  | 2530(30)  | 4650(20)  | 6458(13) | 20(3)          | 1.99 |
| O(2)  | 40(30)    | 1140(20)  | 7577(12) | 17(3)          | 2.18 |
| O(3)  | 5110(30)  | 2330(20)  | 7603(13) | 21(3)          | 1.95 |
| O(4)  | -970(30)  | 6570(20)  | 6810(11) | 18(3)          | 2.23 |
| O(5)  | 2590(30)  | 7140(20)  | 8626(11) | 14(3)          | 2.19 |
| O(6)  | -2380(30) | 6640(20)  | 8906(11) | 13(3)          | 2.30 |
| O(7)  | 560(20)   | 3790(20)  | 42(12)   | 15(3)          | 2.04 |
| O(8)  | -4650(20) | 3051(19)  | 257(11)  | 10(2)          | 2.33 |
| O(9)  | -2730(30) | -50(20)   | 84(12)   | 13(2)          | 2.17 |
| O(10) | 3970(20)  | 8470(20)  | 5385(11) | 9(2)           | 2.24 |
| O(11) | 9060(20)  | 9100(20)  | 5093(11) | 11(2)          | 2.17 |
| O(12) | 7300(20)  | 12260(20) | 5279(11) | 13(3)          | 1.99 |
| O(13) | 1690(30)  | 3380(20)  | 3969(12) | 16(3)          | 1.74 |
| O(14) | 5980(30)  | 5860(20)  | 3804(12) | 19(3)          | 1.71 |
| O(15) | 3120(20)  | 4640(20)  | 2135(11) | 11(2)          | 1.93 |
| O(16) | 5010(30)  | 2380(20)  | 3076(12) | 17(3)          | 1.55 |
| O(17) | 1560(20)  | 7640(20)  | 3209(11) | 11(2)          | 1.87 |
| O(18) | 2710(20)  | 8750(20)  | 1324(11) | 13(3)          | 1.84 |
| O(19) | -1450(20) | 6300(20)  | 1599(11) | 13(3)          | 1.87 |
| O(20) | -520(30)  | 9760(20)  | 2276(12) | 17(3)          | 1.60 |
| S(1)  | 3970(8)   | 4039(7)   | 3244(4)  | 7(1)           | 5.84 |
| S(2)  | 594(8)    | 8163(7)   | 2110(4)  | 7(1)           | 5.97 |

Table S3. Bond lengths [Å] for **ABSI**.

| Bond          | Lengths   | Bond         | Lengths   |
|---------------|-----------|--------------|-----------|
| Ag(1)-O(2)    | 2.415(14) | Bi(2)-O(6)#7 | 2.389(12) |
| Ag(1)-O(8)#1  | 2.430(13) | Bi(2)-O(7)   | 2.442(14) |
| Ag(1)-O(5)#2  | 2.498(15) | Bi(2)-O(9)#3 | 2.503(13) |
| Ag(1)-O(9)    | 2.645(17) | Bi(2)-O(18)  | 2.638(14) |
| Ag(1)-O(18)   | 2.715(14) | Bi(2)-O(5)#8 | 2.662(13) |
| Ag(1)-O(6)    | 2.819(12) | I(1)-O(3)    | 1.784(14) |
| Ag(1)-O(3)    | 2.822(15) | I(1)-O(2)    | 1.799(13) |
| Ag(1)-O(7)    | 2.864(15) | I(1)-O(1)    | 1.821(15) |
| Ag(2)-O(2)#3  | 2.381(15) | I(2)-O(6)    | 1.818(12) |
| Ag(2)-O(5)    | 2.397(13) | I(2)-O(4)    | 1.820(13) |
| Ag(2)-O(10)   | 2.495(13) | I(2)-O(5)    | 1.834(14) |
| Ag(2)-O(4)#4  | 2.593(13) | I(3)-O(9)    | 1.801(14) |
| Ag(2)-O(6)    | 2.611(15) | I(3)-O(8)    | 1.833(11) |
| Ag(2)-O(1)    | 2.842(12) | I(3)-O(7)    | 1.833(13) |
| Ag(2)-O(3)    | 2.844(16) | I(4)-O(11)   | 1.790(12) |
| Bi(1)-O(10)   | 2.325(13) | I(4)-O(12)   | 1.816(14) |
| Bi(1)-O(4)    | 2.383(13) | I(4)-O(10)   | 1.846(12) |
| Bi(1)-O(17)   | 2.417(13) | S(1)-O(13)   | 1.495(13) |
| Bi(1)-O(11)#5 | 2.446(13) | S(1)-O(14)   | 1.492(15) |
| Bi(1)-O(12)#6 | 2.504(14) | S(1)-O(15)   | 1.490(13) |
| Bi(1)-O(13)   | 2.515(15) | S(1)-O(16)   | 1.461(14) |
| Bi(1)-O(14)#5 | 2.560(14) | S(2)-O(17)   | 1.485(13) |
| Bi(1)-O(1)    | 2.561(14) | S(2)-O(18)   | 1.470(13) |
| Bi(2)-O(8)#4  | 2.322(13) | S(2)-O(19)   | 1.498(13) |
| Bi(2)-O(15)   | 2.357(13) | S(2)-O(20)   | 1.451(14) |
| Bi(2)-O(19)#4 | 2.377(13) |              |           |

Table S4. Band gaps of some reported bismuth-containing iodates

| Formula                                                                           | E <sub>g</sub> (eV) | Formula                                                                                        | E <sub>g</sub> (eV) |
|-----------------------------------------------------------------------------------|---------------------|------------------------------------------------------------------------------------------------|---------------------|
| Bi <sub>2</sub> (IO <sub>4</sub> )(IO <sub>3</sub> ) <sub>3</sub> <sup>16</sup>   | 3.3                 | Bi <sub>2</sub> Te(IO <sub>3</sub> )O <sub>5</sub> Cl <sup>17</sup>                            | 3.6                 |
| BiO(IO <sub>3</sub> ) <sup>18</sup>                                               | 3.3                 | KBi <sub>2</sub> (IO <sub>3</sub> ) <sub>2</sub> F <sub>5</sub> <sup>19</sup>                  | 3.75                |
| K <sub>2</sub> Bi <sub>5</sub> O <sub>15</sub> <sup>20</sup>                      | 3.50                | RbBi <sub>2</sub> (IO <sub>3</sub> ) <sub>2</sub> F <sub>5</sub> <sup>19</sup>                 | 3.78                |
| Rb <sub>2</sub> Bi <sub>5</sub> O <sub>15</sub> <sup>20</sup>                     | 3.53                | CsBi <sub>2</sub> (IO <sub>3</sub> ) <sub>2</sub> F <sub>5</sub> <sup>19</sup>                 | 3.84                |
| Bi <sub>3</sub> OF <sub>3</sub> (IO <sub>3</sub> ) <sub>4</sub> <sup>21</sup>     | 3.7                 | (NH <sub>4</sub> )Bi <sub>2</sub> (IO <sub>3</sub> ) <sub>2</sub> F <sub>5</sub> <sup>22</sup> | 3.88                |
| Bi(IO <sub>3</sub> )F <sub>2</sub> <sup>23</sup>                                  | 3.97                | KBi(IO <sub>3</sub> ) <sub>3</sub> (OH) <sup>24</sup>                                          | 3.50                |
| Bi <sub>2</sub> O(SeO <sub>4</sub> )(IO <sub>3</sub> ) <sub>2</sub> <sup>25</sup> | 3.70                | NaBi(IO <sub>3</sub> ) <sub>4</sub> <sup>24</sup>                                              | 3.45                |
| Bi <sub>2</sub> O(SO <sub>4</sub> )(IO <sub>3</sub> ) <sub>2</sub> <sup>25</sup>  | 3.74                | AgBi(SO <sub>4</sub> )(IO <sub>3</sub> ) <sub>2</sub>                                          | 3.40                |

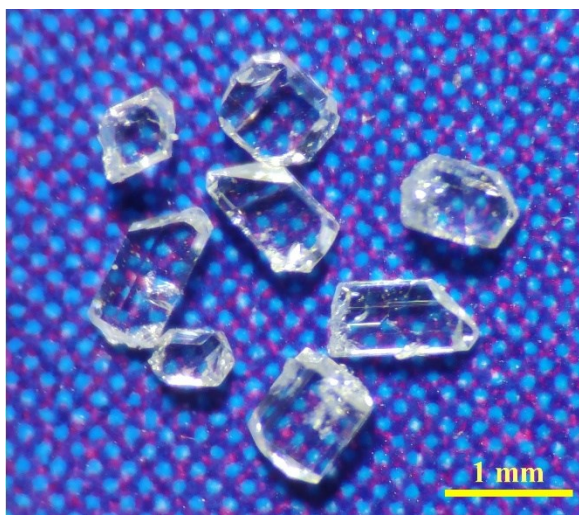

Figure S1 The image of single crystals of **ABSI**.

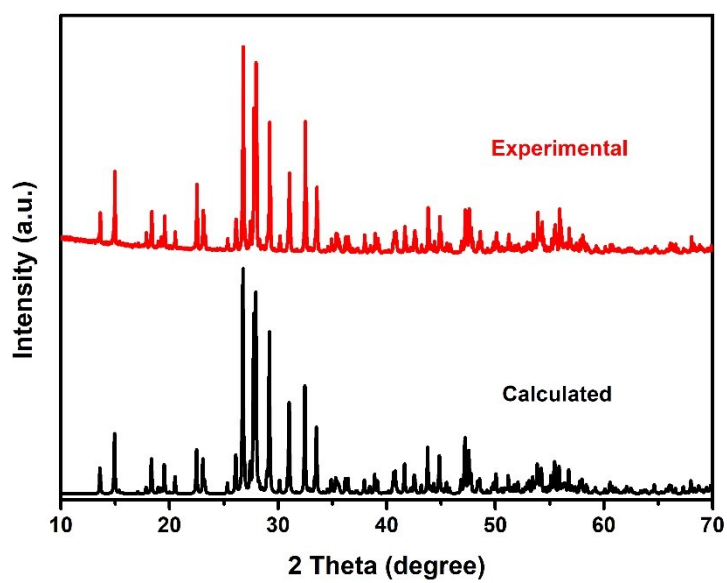

Figure S2. Simulated and measured powder X-ray diffraction patterns of **ABSI**



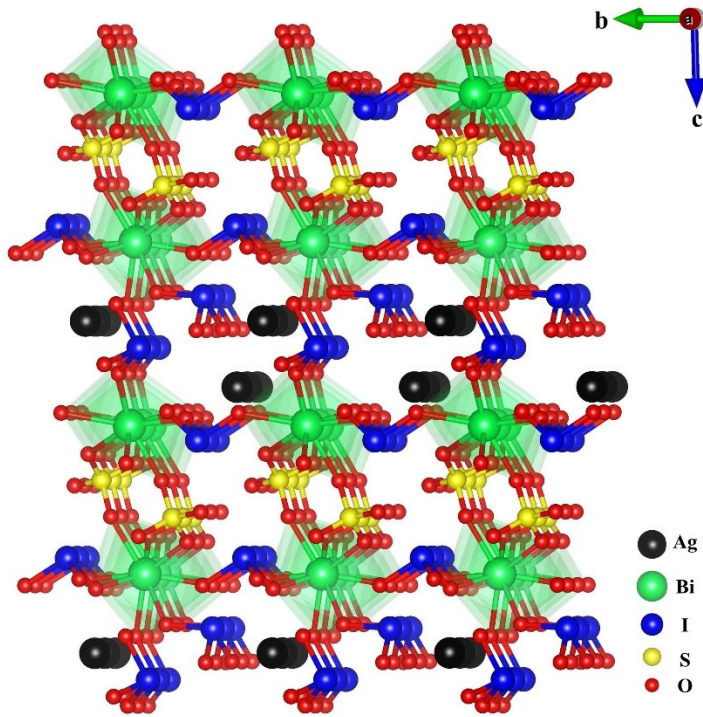

Figure S3. The three-dimensional structure of **ABSI**

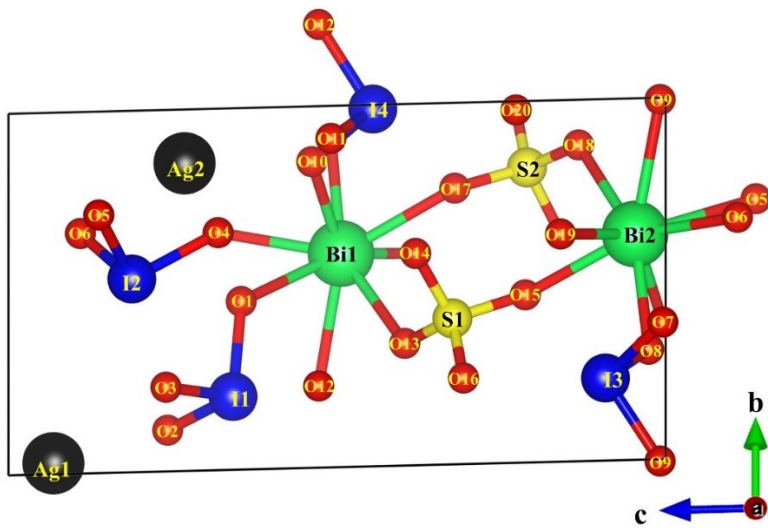

Figure S4. The unit cell of **ABSI**

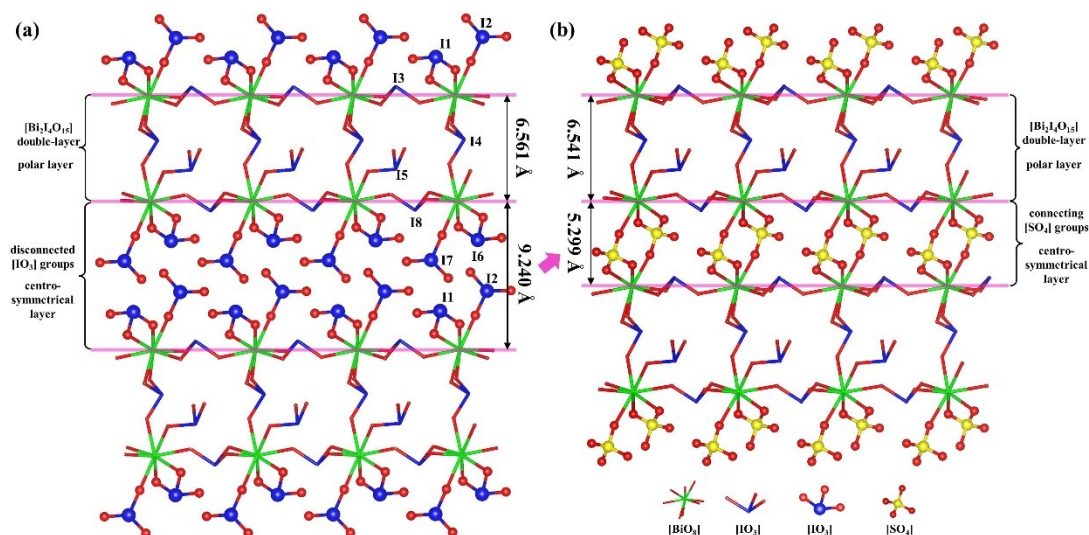

Figure S5. The framework of (a)  $\text{AgBi}(\text{IO}_3)_4$  (**ABI**) and (b)  $\text{AgBi}(\text{SO}_4)(\text{IO}_3)_2$  (**ABSI**) (with Ag atoms removed). The polar  $[\text{Bi}_2\text{I}_4\text{O}_{15}]$  double-layer formed by  $[\text{BiO}_8]$  and  $[\text{IO}_3]$  are in the wires mode. And centro-symmetrical layers consisting by  $[\text{I}(1)\text{O}_3]$ ,  $[\text{I}(2)\text{O}_3]$ ,  $[\text{I}(6)\text{O}_3]$ ,  $[\text{I}(7)\text{O}_3]$  groups in **ABI** and  $[\text{SO}_4]$  groups in **ABSI** on both sides of polar layer are in the ball-and-stick mode.

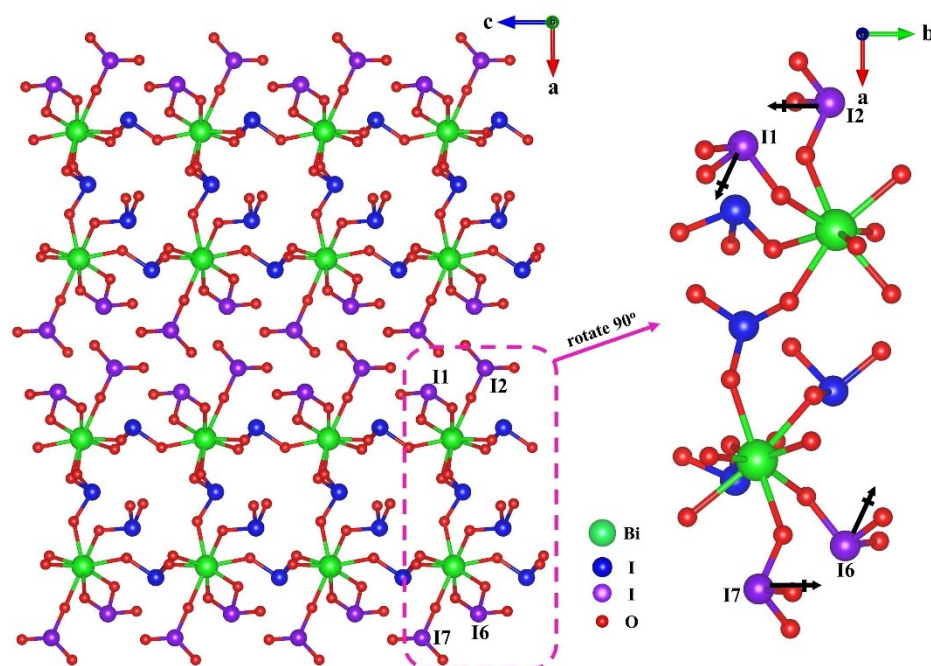

Figure S6. The approximate local dipole moment (black arrow) for  $[\text{IO}_3]$  groups on both sides of  $[\text{Bi}_2\text{I}_4\text{O}_{15}]_\infty$  layer in the structure of  $\text{AgBi}(\text{IO}_3)_4$ . They are connected by centro-symmetry operation with local dipole moment canceling each other out.

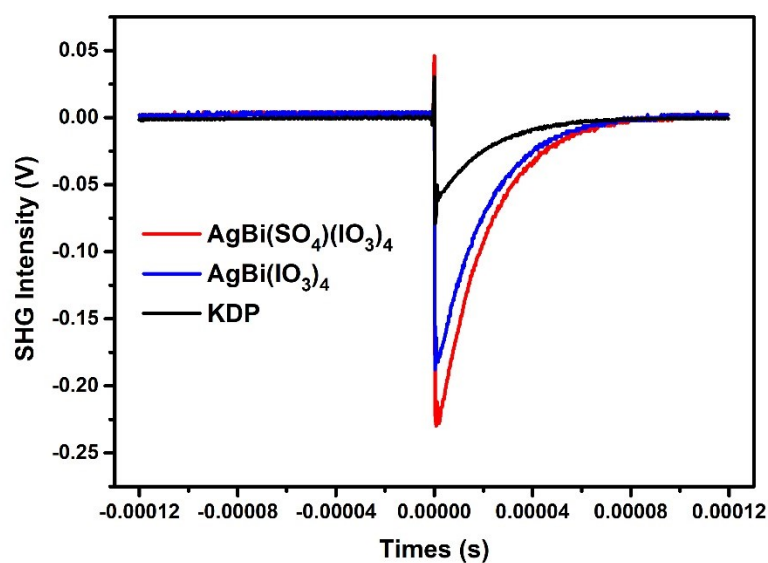

Figure S7. Oscilloscope traces of the SHG signals for KDP, **ABI** and **ABSI** at the powder size of 200–250  $\mu\text{m}$  under 1064 nm laser radiation

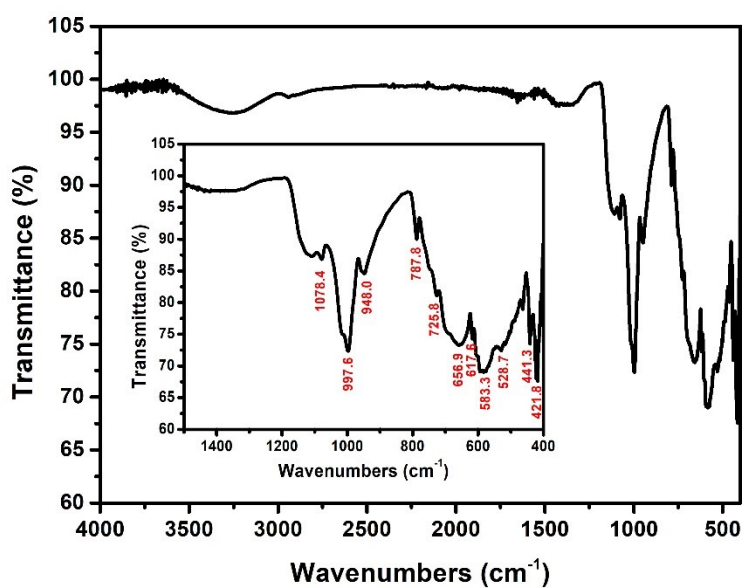

Figure S8. The IR spectrum of **ABSI**

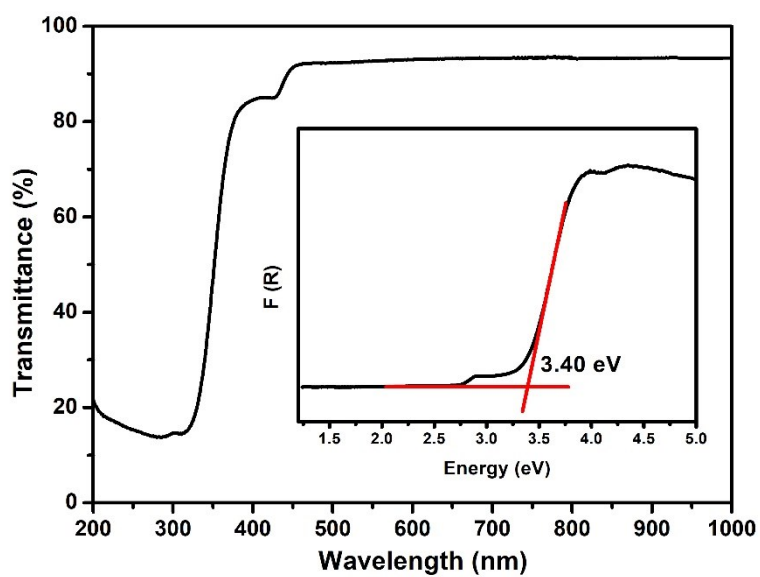

Figure S9. The UV-vis diffuse reflectance spectrum of **ABSI**

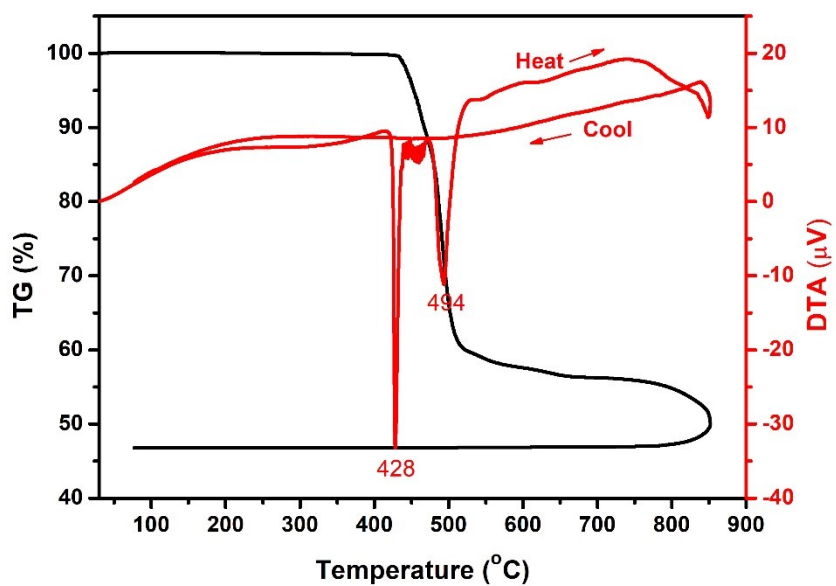

Figure S10. TG and DTA curves for **ABSI**

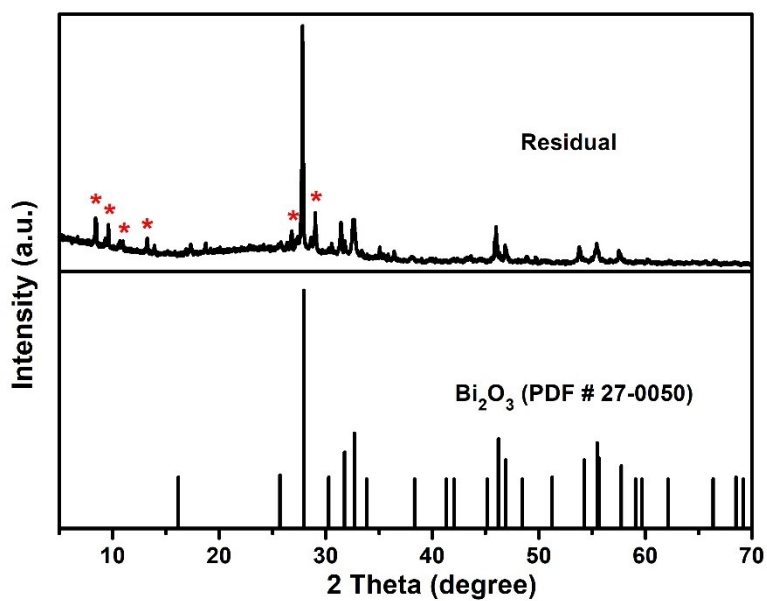

Figure S11. The powder XRD patterns of the residue after TG analysis of **ABSI** (some unknown peaks are labeled by red stars)

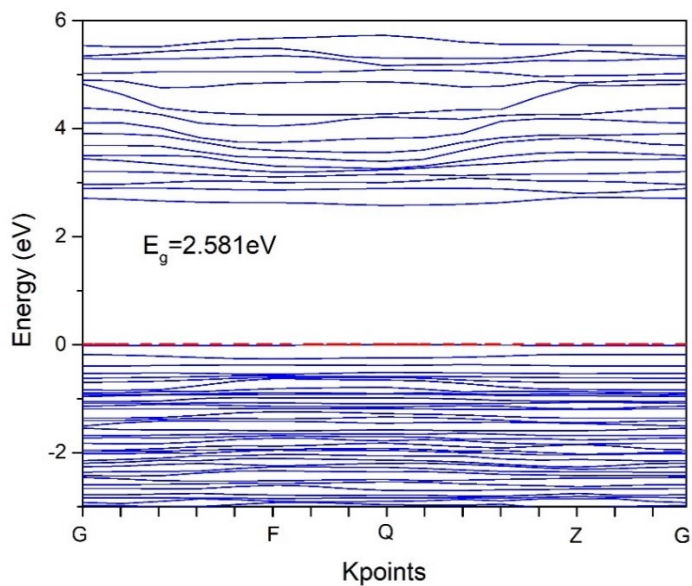

Figure S12. The calculated electron band structures of **ABSI**

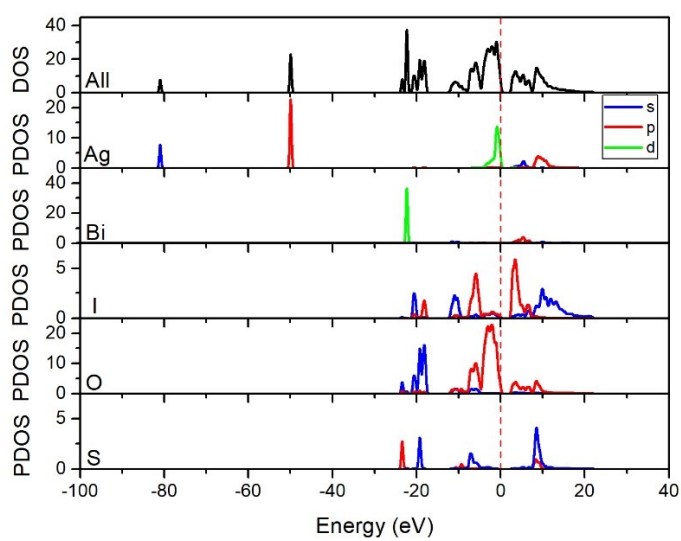

Figure S13. The partial density of states (PDOS) projected onto the constituent atoms of **ABSI**

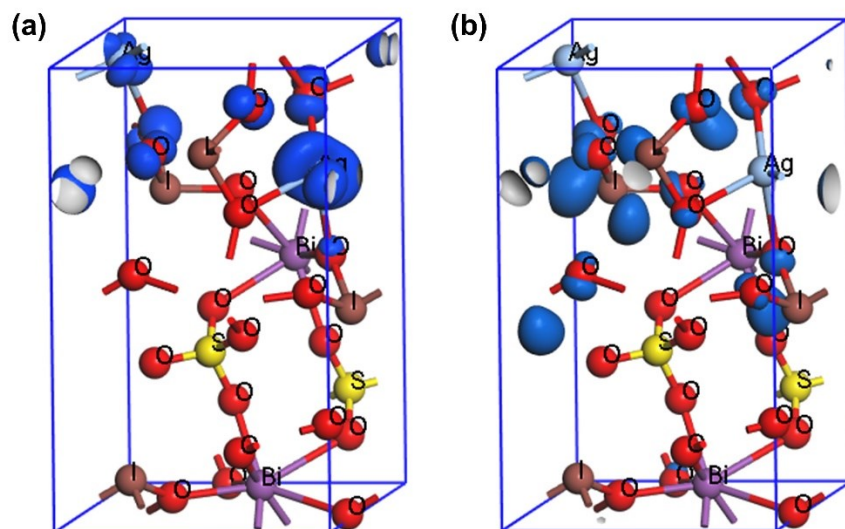

Figure S14. The orbital isosurfaces showing the highest orbital under VB maximum (a) and the lowest orbital above CB minimum (b) in **ABSI**

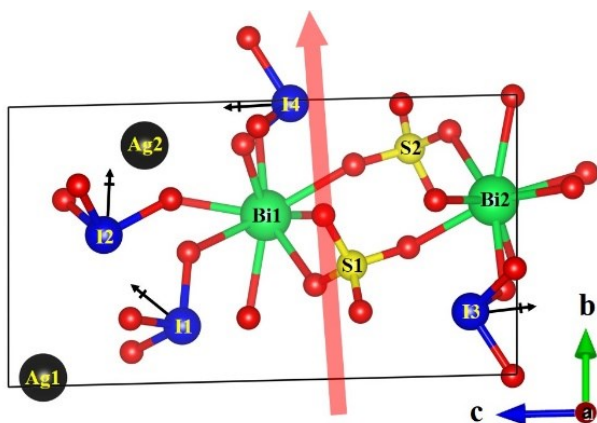

Figure S15. The approximate local dipole moment (black arrow) for  $[IO_3]$  groups and net-polarization (red arrow) in the unit cell of **ABSI**

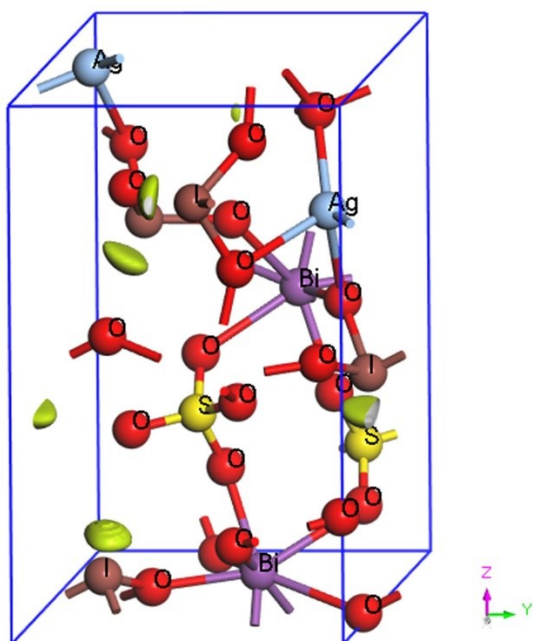

Figure S16. The electron localization function (ELF) isosurfaces for the pseudopotential calculations of **ABSI**

## REFERENCES

1. V. SAINT, *Inc., Madison, WI*, 2008.
2. G. M. Sheldrick, *Acta Crystallographica Section A*, 2008, **64**, 112-122.
3. G. M. Sheldrick, *Inc.: Madison, WI*, 2003.
4. W. M. Wendlandt and H. G. Hecht, *Reflectance spectroscopy: Interscience*, J Wiley and Sons, Inc., New York, 1966.
5. S. K. Kurtz and T. T. Perry, *J. Appl. Phys.*, 1968, **39**, 3798-3813.
6. S. J. Clark, M. D. Segall, C. J. Pickard, P. J. Hasnip, M. I. Probert, K. Refson and M. C. Payne, *Zeitschrift für Kristallographie*, 2005, **220**, 567-570.
7. W. Kohn and L. J. Sham, *Phys. Rev.*, 1965, **140**, A1133-A1138.
8. J. P. Perdew, K. Burke and M. Ernzerhof, *Phys. Rev. Lett.*, 1996, **77**, 3865-3868.
9. J. P. Perdew and Y. Wang, *Phys. Rev. B*, 1992, **46**, 12947-12954.
10. A. M. Rappe, K. M. Rabe, E. Kaxiras and J. D. Joannopoulos, *Phys. Rev. B*, 1990, **41**, 1227-1230.
11. H. J. Monkhorst and J. D. Pack, *Phys. Rev. B*, 1976, **13**, 5188-5192.
12. B. G. Pfrommer, M. Côté, S. G. Louie and M. L. Cohen, *J. Comput. Phys.*, 1997, **131**, 233-240.
13. R. W. Godby, M. Schlüter and L. J. Sham, *Phys. Rev. B*, 1988, **37**, 10159-10175.
14. J. Lin, M. Lee, Z. Liu, C. Chen and C. J. Pickard, *Phys. Rev. B*, 1999, **60**, 13380-13389.
15. M. Lee, C. Yang and J. Jan, *Phys. Rev. B*, 2004, **70**, 235110.
16. Z. Cao, Y. Yue, J. Yao, Z. Lin, R. He and Z. Hu, *Inorg. Chem.*, 2011, **50**, 12818-12822.
17. L. Geng, C. Meng, H. Lu, Z. Luo, C. Lin and W. Cheng, *Dalton Trans.*, 2015, **44**, 2469-2475.
18. S. D. Nguyen, J. Yeon, S. Kim and P. S. Halasyamani, *J. Am. Chem. Soc.*, 2011, **133**, 12422-12425.
19. H. Liu, Q. Wu, X. Jiang, Z. Lin, X. Meng, X. Chen and J. Qin, *Angew. Chem. Inter. Ed.*, 2017, **129**, 9620-9624.
20. Y. Huang, X. Meng, P. Gong, L. Yang, Z. Lin, X. Chen and J. Qin, *J. Mater. Chem. C*, 2014, **2**, 4057-4062.
21. M. Zhang, X. Su, M. Mutailipu, Z. Yang and S. Pan, *Chem. Mater.*, 2017, **29**, 945-949.
22. H. Fan, C. Lin, K. Chen, G. Peng, B. Li, G. Zhang, X. Long and N. Ye, *Angew. Chem. Inter. Ed.*, 2020, **132**, 5306-5310.
23. F. Mao, C. Hu, X. Xu, D. Yan, B. Yang and J. Mao, *Angew. Chem. Inter. Ed.*, 2017, **56**, 2151-2155.
24. Y. Jia, Y. Chen, T. Wang, Y. Guo, X. Guan and X. Zhang, *Dalton Trans.*, 2019, **48**, 10320-10326.
25. L. Shi, D. Mei, J. Xu and Y. Wu, *Solid State Sci.*, 2017, **63**, 54-61.
